# Supplementary material
Source: PubMed Central journal article supplement (PMC2544548)
Supplement: 0804099105_0804099105SI.pdf [file 0804099105_0804099105SI.pdf]

# Supporting Information

Li et al. 10.1073/pnas.0804099105

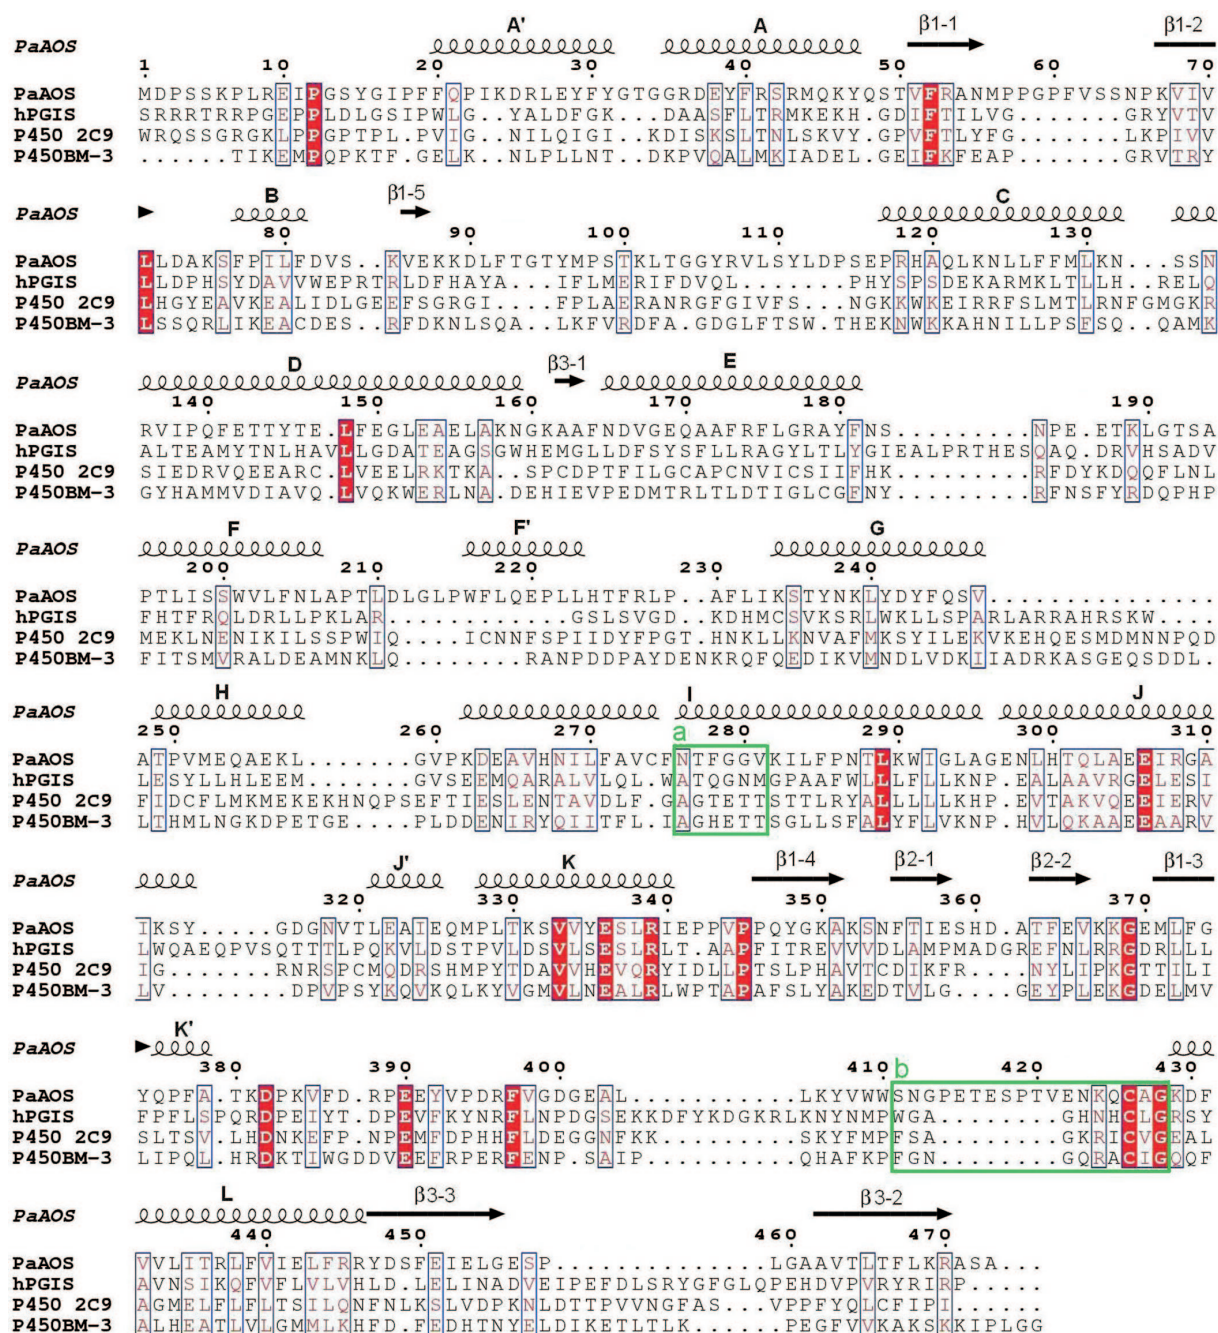

Fig. S1. Structure-based sequence alignment of allene oxide synthase (AOS) and human prostacyclin synthase (PGIS), human P450 2C9, and bacterial P450BM-3. The secondary structure elements observed in the AOS structure are shown above the alignment. The P450 signature sequence and heme-binding motif are enclosed in green boxes a and b, respectively. Conserved residues are highlighted. This figure was produced with ENDscript [Gouet P, Courcelle E (2002) ENDscript: A workflow with web interface to display sequence and structure information. *Bioinformatics* 18:767–768].

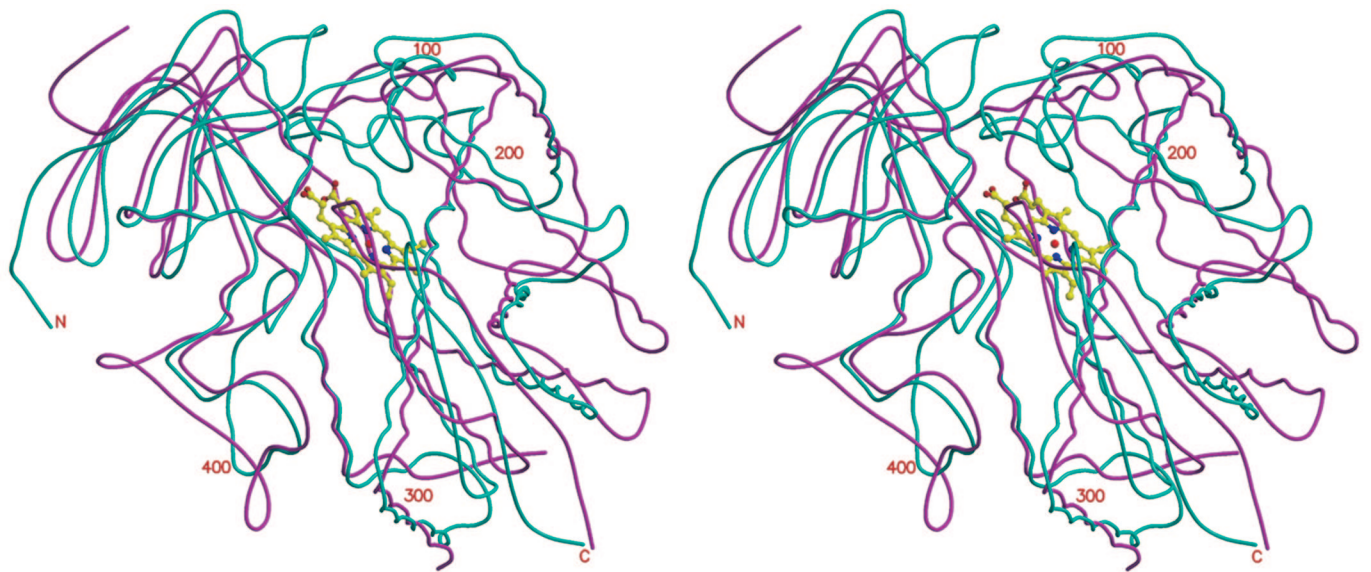

Fig. S2. Stereo diagram showing the superimposition of the structures of AOS (cyan) and human PGIS (magenta; PDB ID: 2IAG).

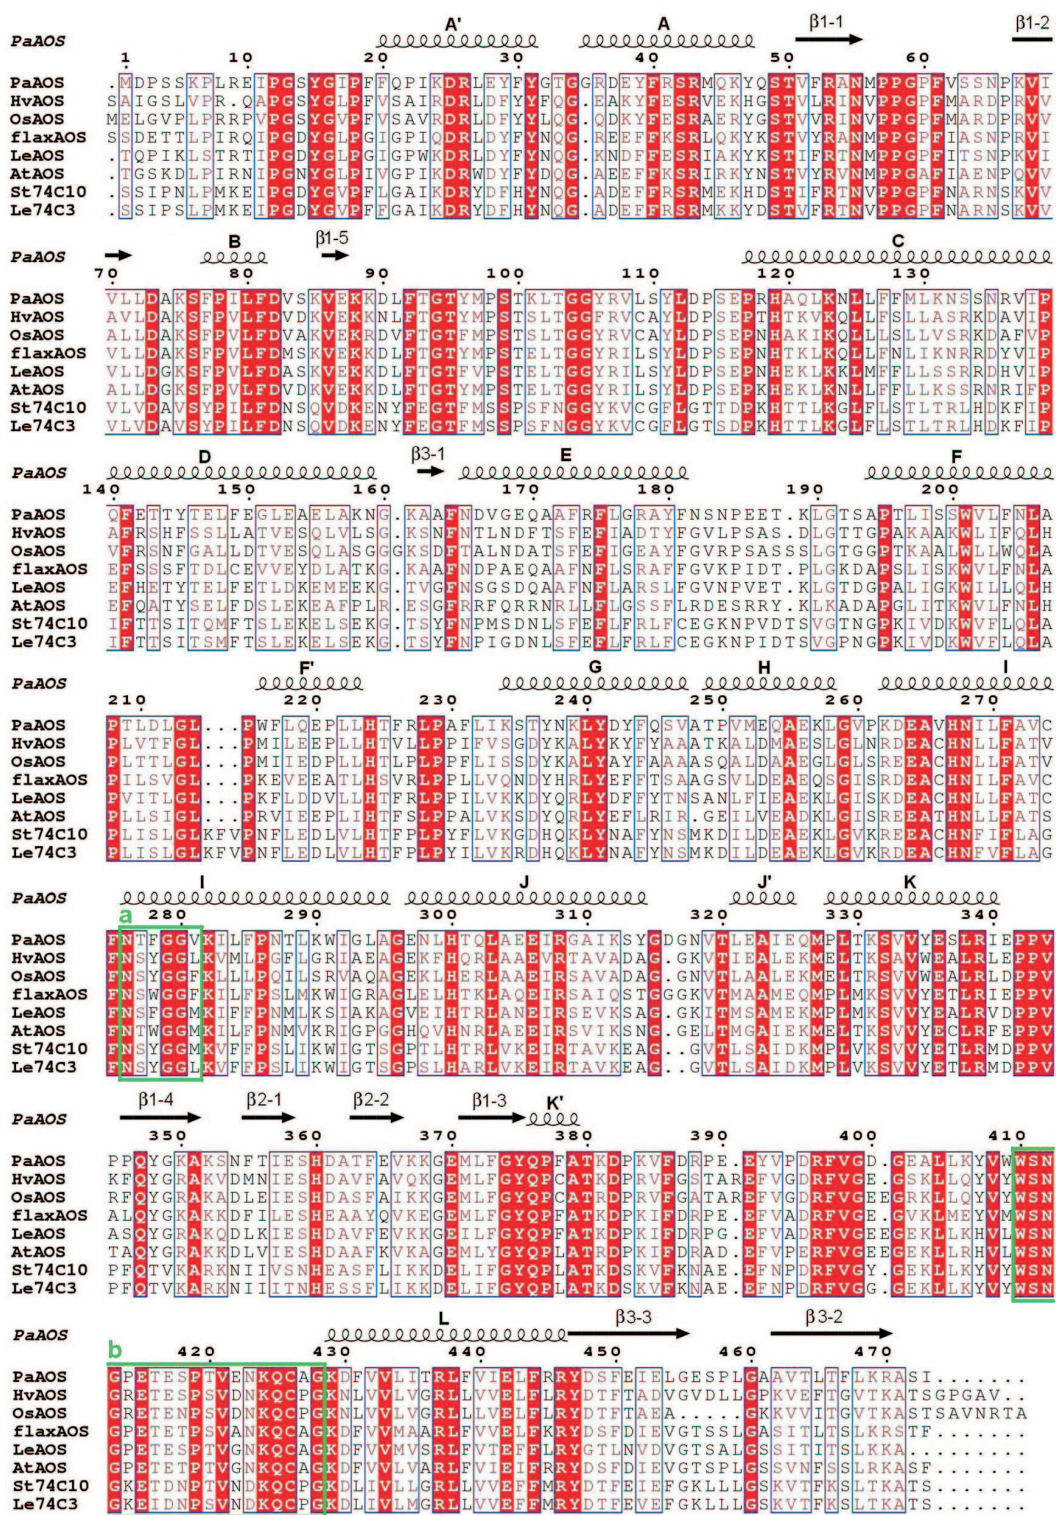

**Fig. S3.** Sequence alignment of AOSs from guayule (*Parthenium argentatum*), barley (*Hordeum vulgare*), rice (*Oryza sativa*), flaxseed (*Linum usitatissimum*), tomato (*Lycopersicon esculentum*), and *Arabidopsis thaliana*; CYP74C10 from potato (*Solanum tuberosum*) and CYP74C3 from *L. esculentum*. The N-terminal transit sequences were omitted for flax AOS, LeAOS, AtAOS, StCYP74C10, and LeCYP74C3. The P450 signature sequence and heme-binding motif are enclosed in green boxes a and b. Conserved residues are highlighted.

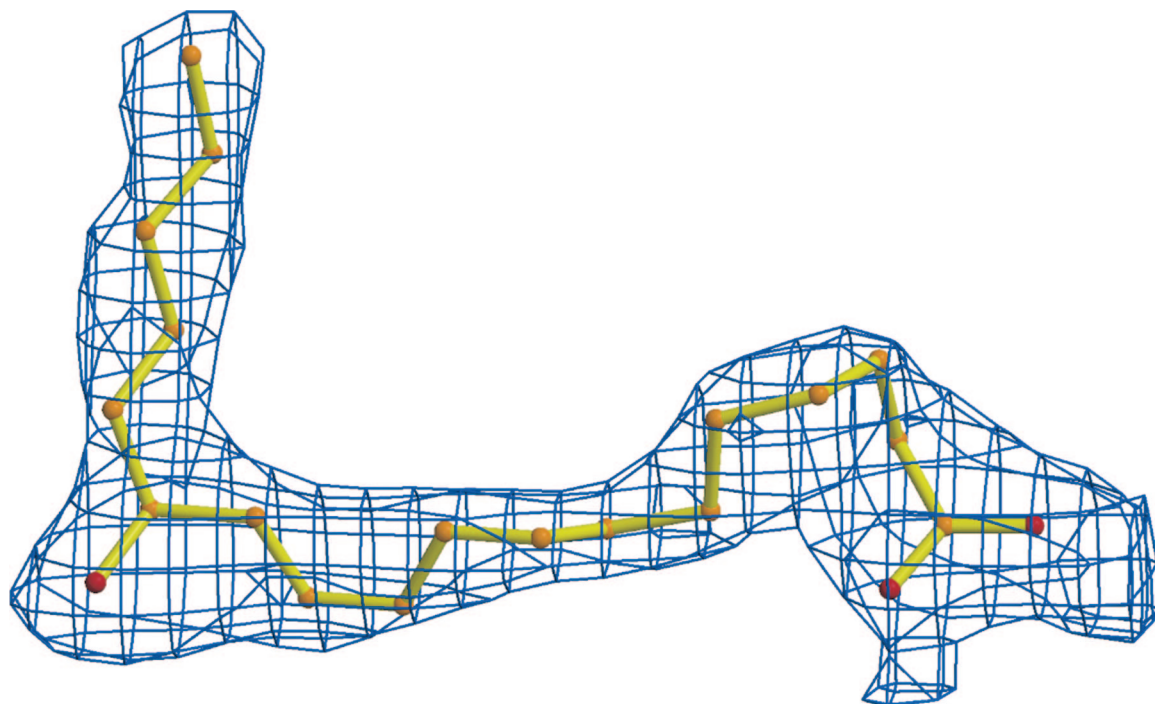

Fig. S4.  $2F_o - F_c$  electron density omit map of substrate analog 13(S)-HODE contoured at  $1.0 \sigma$ .

**Table S1. Data collection and phasing statistics**

| Parameter                      | Native 1                                        | Se                                              | Fe                                              | Native 2                                        | 13(S)-HODE                                      |
|--------------------------------|-------------------------------------------------|-------------------------------------------------|-------------------------------------------------|-------------------------------------------------|-------------------------------------------------|
| Space group                    | <i>I</i> 422                                    |
| Cell, Å                        | <i>a</i> = <i>b</i> = 126.5<br><i>c</i> = 163.9 | <i>a</i> = <i>b</i> = 126.0<br><i>c</i> = 167.1 | <i>a</i> = <i>b</i> = 125.7<br><i>c</i> = 166.3 | <i>a</i> = <i>b</i> = 113.5<br><i>c</i> = 163.8 | <i>a</i> = <i>b</i> = 128.3<br><i>c</i> = 160.0 |
| Resolution, Å                  | 28.4–2.4 (2.49–2.4)                             | 40.7–2.8 (2.9–2.8)                              | 39.8–2.6 (2.69–2.6)                             | 28.4–1.8 (1.86–1.8)                             | 49.2–2.6 (2.69–2.6)                             |
| Wavelength, Å                  | 1.5418                                          | 0.972                                           | 1.742                                           | 1.001                                           | 1.5418                                          |
| Total reflections              | 127,004                                         | 181,074                                         | 199,076                                         | 407,286                                         | 107,397                                         |
| Unique reflections             | 26,120                                          | 16,692                                          | 20,068                                          | 48,912                                          | 20,482                                          |
| Completeness, %                | 98.6 (100)                                      | 99.0 (92.4)                                     | 96.0 (96.4)                                     | 98.1 (99.2)                                     | 98.0 (96.0)                                     |
| $R_{\text{sym}}^{\dagger}$ , % | 8.0 (59.4)                                      | 10.6 (58.8)                                     | 7.8 (55.9)                                      | 6.0 (45.5)                                      | 11.3 (33.3)                                     |
| $\  \sigma, I$                 | 15.2 (2.4)                                      | 17.9 (2.1)                                      | 24.0 (3.7)                                      | 29.5 (4.0)                                      | 10.5 (3.2)                                      |
| Figurer of merit               | 0.22                                            |                                                 |                                                 |                                                 |                                                 |

Numbers in parentheses are for the highest resolution shell.

$R_{\text{sym}}^{\dagger} = \sum_{\text{hkl}} |I - \langle I \rangle| / \sum I$ , where  $I$  is the observed intensity and  $\langle I \rangle$  is the average intensity from observations of symmetry-related reflections. A subset of the data (10%) was excluded from the refinement and used to calculate the free  $R$  value ( $R_{\text{free}}$ ).  $R$  factor =  $\sum ||F_o| - |F_c|| / \sum |F_o|$ .

**Table S2. Refinement statistics**

| Parameter                                | Native 1 | Native 2 | w. 13(S)-HODE |
|------------------------------------------|----------|----------|---------------|
| <i>R</i> factor, %                       | 19.8     | 18.0     | 21.9          |
| <i>R</i> <sub>free</sub> , %             | 24.3     | 20.8     | 27.0          |
| No. of protein atoms                     | 3,742    | 3,782    | 3,742         |
| No. of solvent atoms                     | 206      | 378      | 147           |
| No. of ligand atoms                      | 43       | 43       | 64            |
| Average <i>B</i> factors, Å <sup>2</sup> |          |          |               |
| All atoms                                | 42.9     | 20.9     | 27.2          |
| Protein                                  | 43.2     | 19.4     | 27.4          |
| Solvent                                  | 40.7     | 36.0     | 24.4          |
| Ligands                                  | 34.3     | 14.8     | 22.9          |
| Rmsd from ideal values                   |          |          |               |
| Bond length, Å                           | 0.006    | 0.005    | 0.009         |
| Bond angle, °                            | 1.40     | 1.30     | 1.40          |
